# Supplementary material for: One-step synthesis of golf ball-like thiol-functionalized silica particles
Source: Royal Society of Chemistry journal article supplement (doi:10.1039/d0sm01214a), 2020-01-01
Supplement: d0sm01214a1.pdf [file d0sm01214a1.pdf]

Electronic Supplementary Information (ESI) for

**One-Step Synthesis of Golf Ball-Like Thiol-Functionalized Silica  
Particles**

Ruixue Liang, Xia Fang, Biwei Qiu and Hua Zou\*

School of Materials Science and Engineering, University of Shanghai for Science and  
Technology, 516 Jungong Road, Shanghai 200093, China.

E-mail: hua.zou@usst.edu.cn.

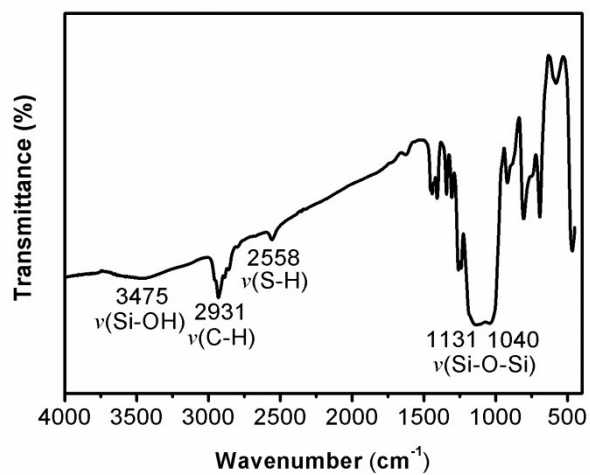

**Fig. S1.** FT-IR spectrum of the golf ball-like SiO<sub>2</sub>-SH particles.

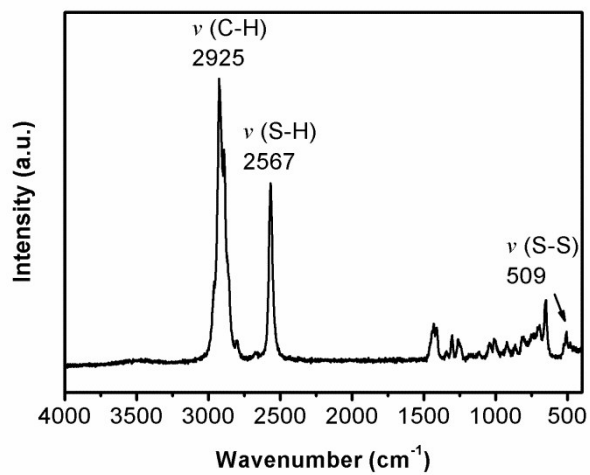

**Fig. S2.** Raman spectrum of the golf ball-like SiO<sub>2</sub>-SH particles.

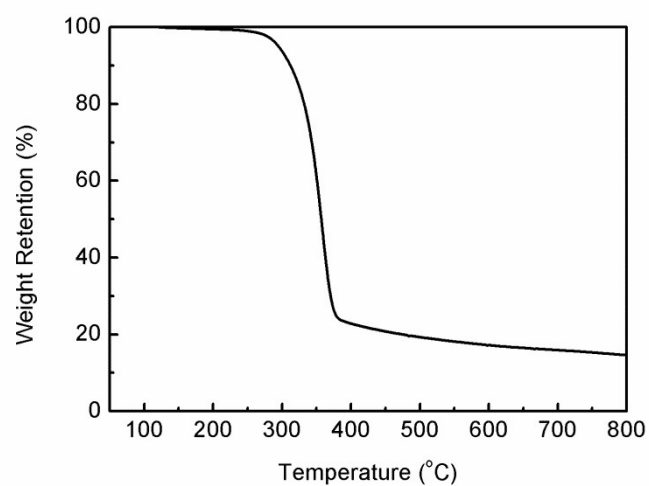

**Fig. S3.** TGA curve of golf ball-like SiO<sub>2</sub>-SH particles.

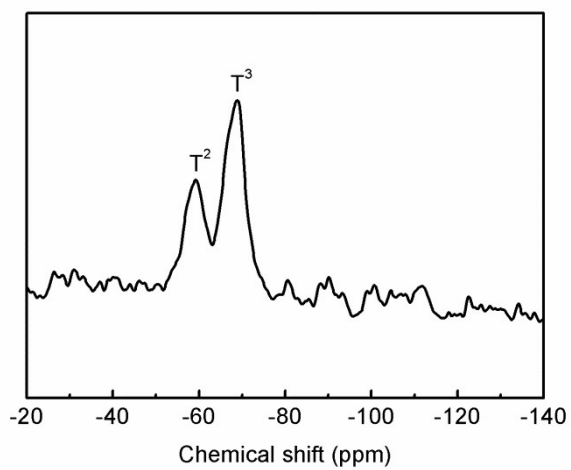

**Fig. S4.** Solid state <sup>29</sup>Si NMR spectrum of the golf ball-like SiO<sub>2</sub>-SH particles.
